# Supplementary material for: Adverse Crosstalk between Extracellular Matrix Remodeling and Ferroptosis in Basal Breast Cancer
Source: MDPI journal article supplement (doi:10.3390/cells12172176), 2023-08-30
Supplement: s1 [file s1]

# Adverse Crosstalk Between Extracellular Matrix Remodeling and Ferroptosis in Basal Breast Cancer

Christophe Desterke <sup>1,\*</sup>, Emma Cosialls <sup>2,3</sup>, Yao Xiang <sup>2</sup>, Rima Elhage <sup>2,3</sup>, Clémence Duruel <sup>2,3</sup>, Yunhua Chang <sup>2</sup> and Ahmed Hamai <sup>2,3,\*</sup>

Supplemental material

## Supplemental Figures

Figure S1: Kaplan-Meier of combined adverse 170 ferroptosis-related genes; Figure S2: Differential expression analysis between normal control breast and primary/metastatic breast cancer in RNAseq; Figure S3: Multitroc analysis of the eleven-gene signature against the TNBC phenotype; Figure S4: Multitroc analysis of the eleven-gene signature against dld-30 and residual cancer burden; Figure S5: Kaplan-Meier of the optimal age category stratification; Figure S6: Schoenfeld test of the multivariable model with DRFS as the outcome ;

## Supplemental Table

Table S1: List of univariate Cox analysis for the 252 ferroptosis-related significant genes against Distant Relapse-Free Survival in the transcriptome cohort (GSE25066)

A

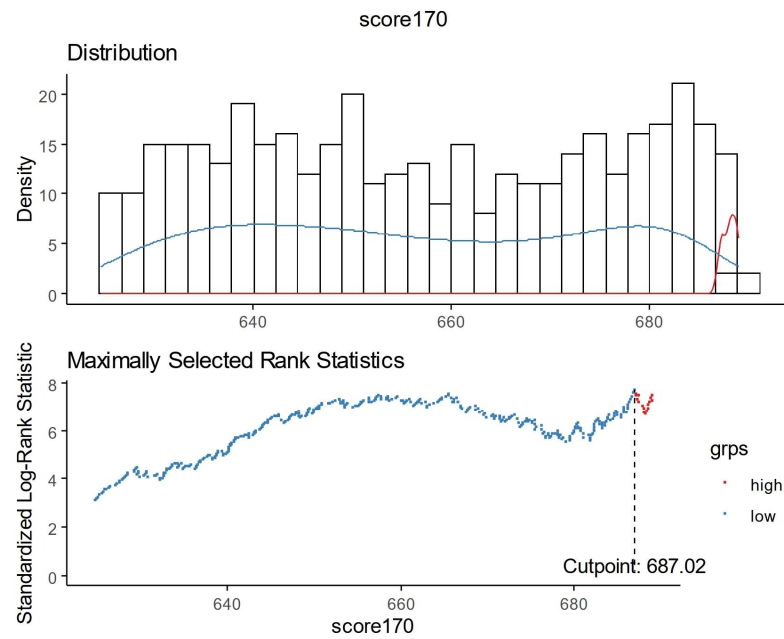

B

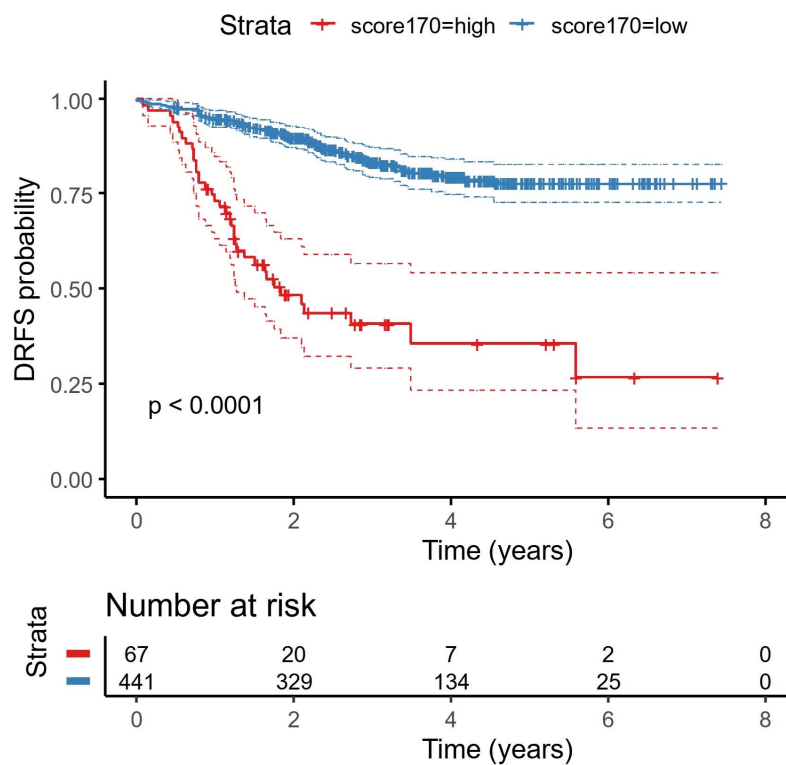

**Figure S1:** Kaplan-Meier of combined adverse 170 ferroptosis-related genes: A/ optimal cutpoint threshold determination on 170 ferroptosis adverse gene score with distant relapse-free survival (DRFS) as the outcome; B/ Kaplan-Meier stratified on optimal threshold of 170 ferroptosis adverse gene score.

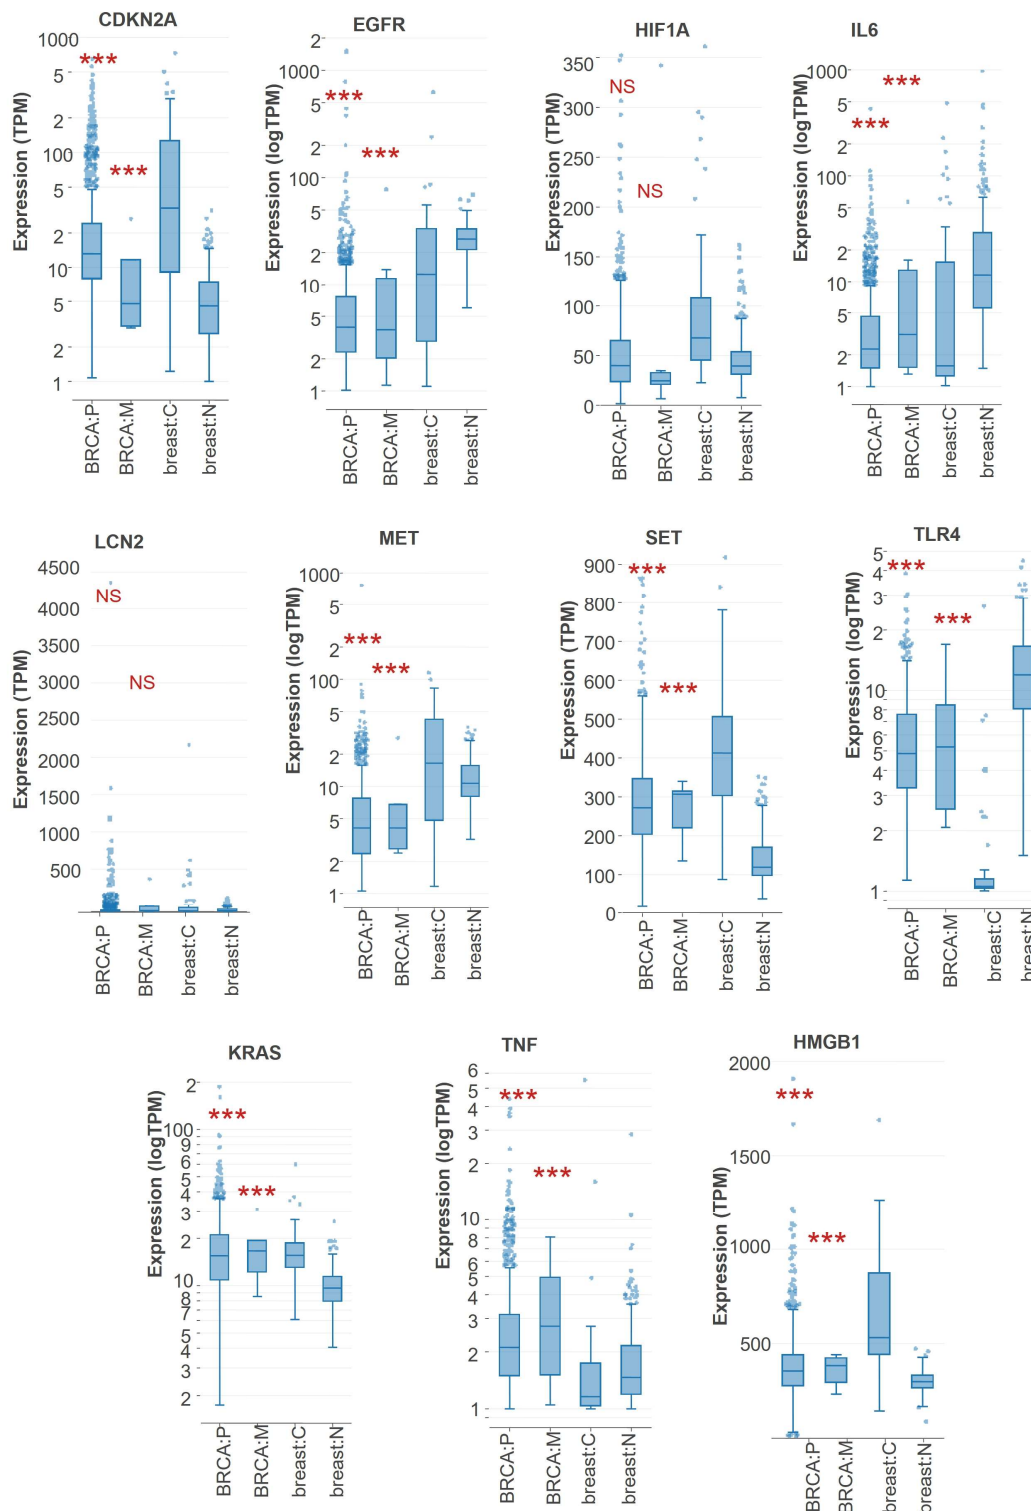

**Supplemental Figure 2:** Differential expression analysis between normal control breast and primary/metastatic breast cancer in RNAseq. For each eleven genes selected in score of ferroptosis/ECM remodeling in breast is expression in primary (BRCA:P) / metastatic (BRCA:M) breast cancer was compared to control normal breast (breast:N) by aggregation of TCGA/GTEX transcriptome on MiPanda server (remark: breast:C corresponds to breast cell lines from CCLE). significance: \*,  $0.01 < p < 0.05$ , \*\*,  $0.001 < p < 0.01$ , \*\*\*,  $p < 0.001$ .

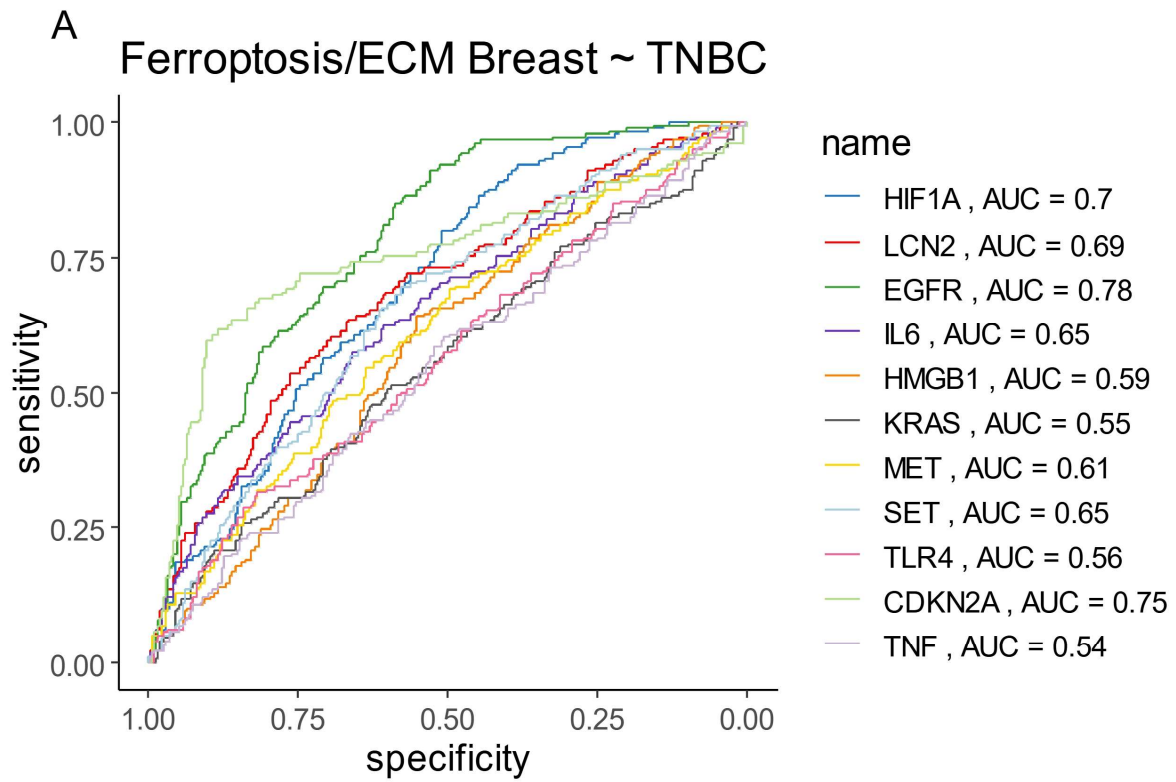

**Supplemental Figure 3:** Multiroc analysis of the eleven-gene signature against the TNBC phenotype

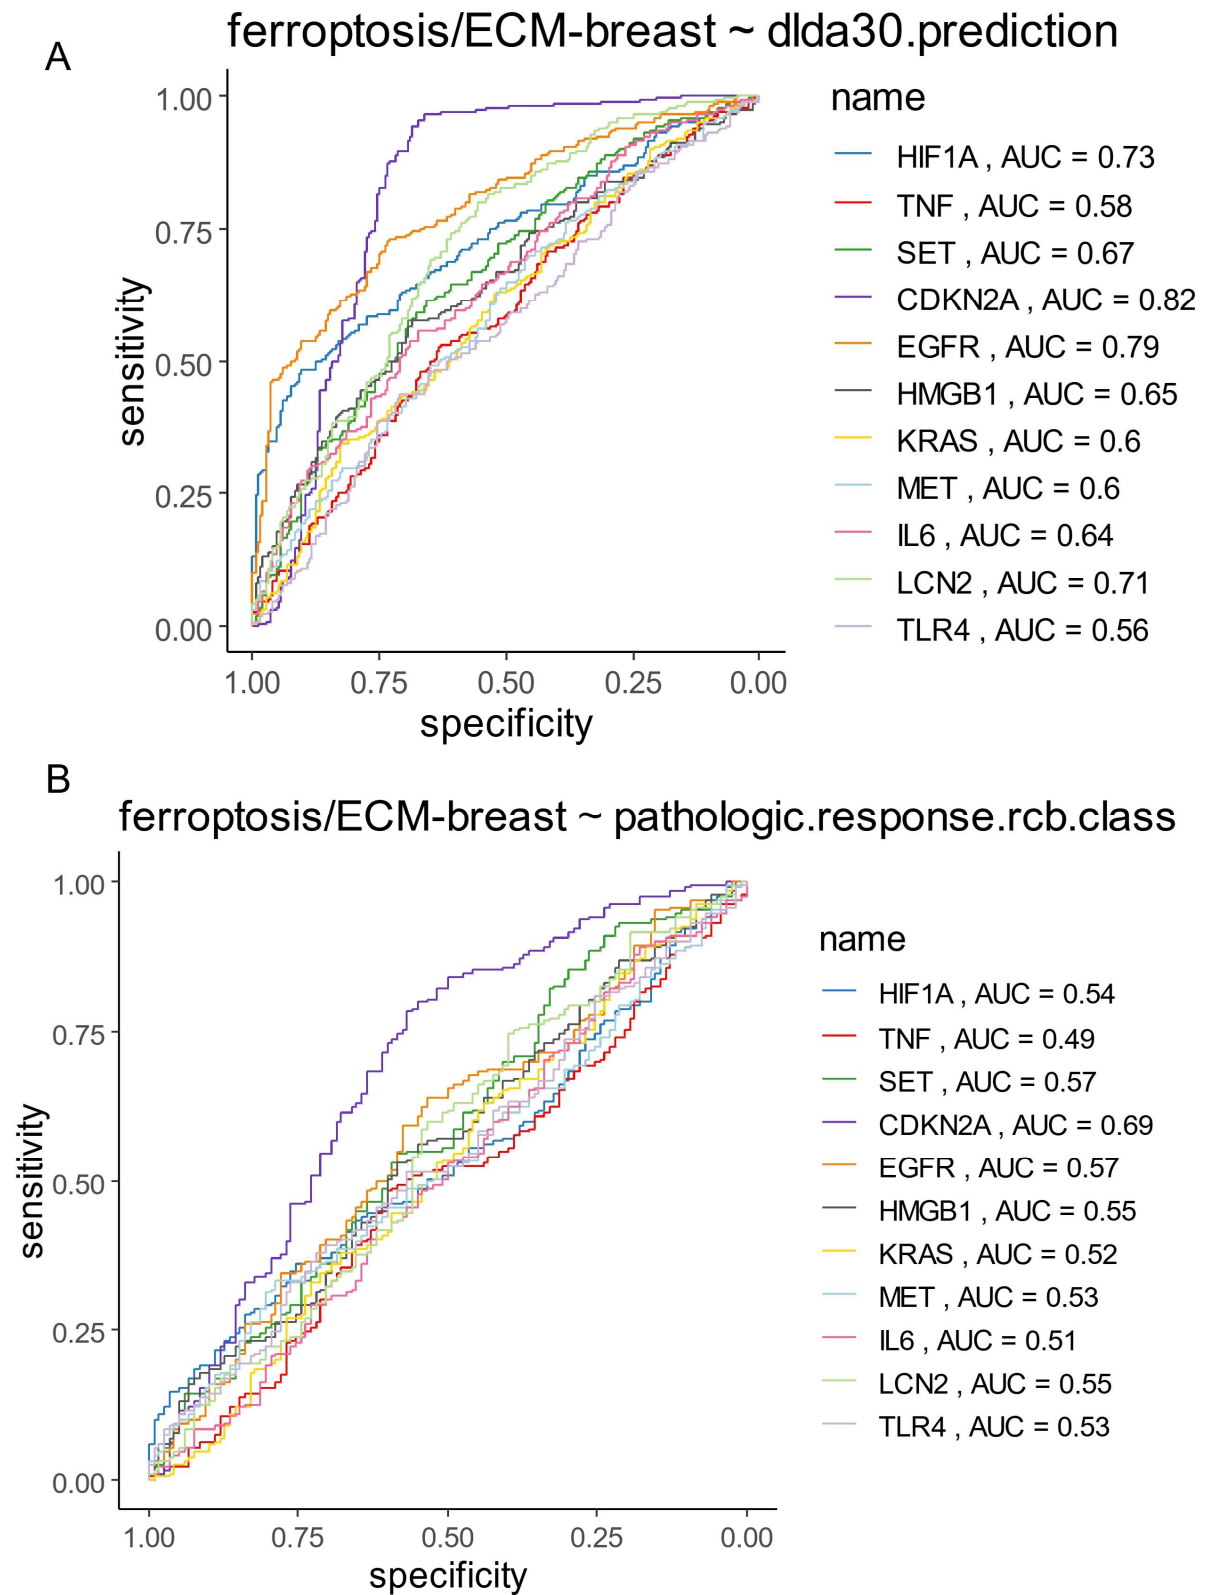

**Supplemental Figure 4:** Multiroc analysis of the eleven-gene signature against dld-30 and residual cancer burden

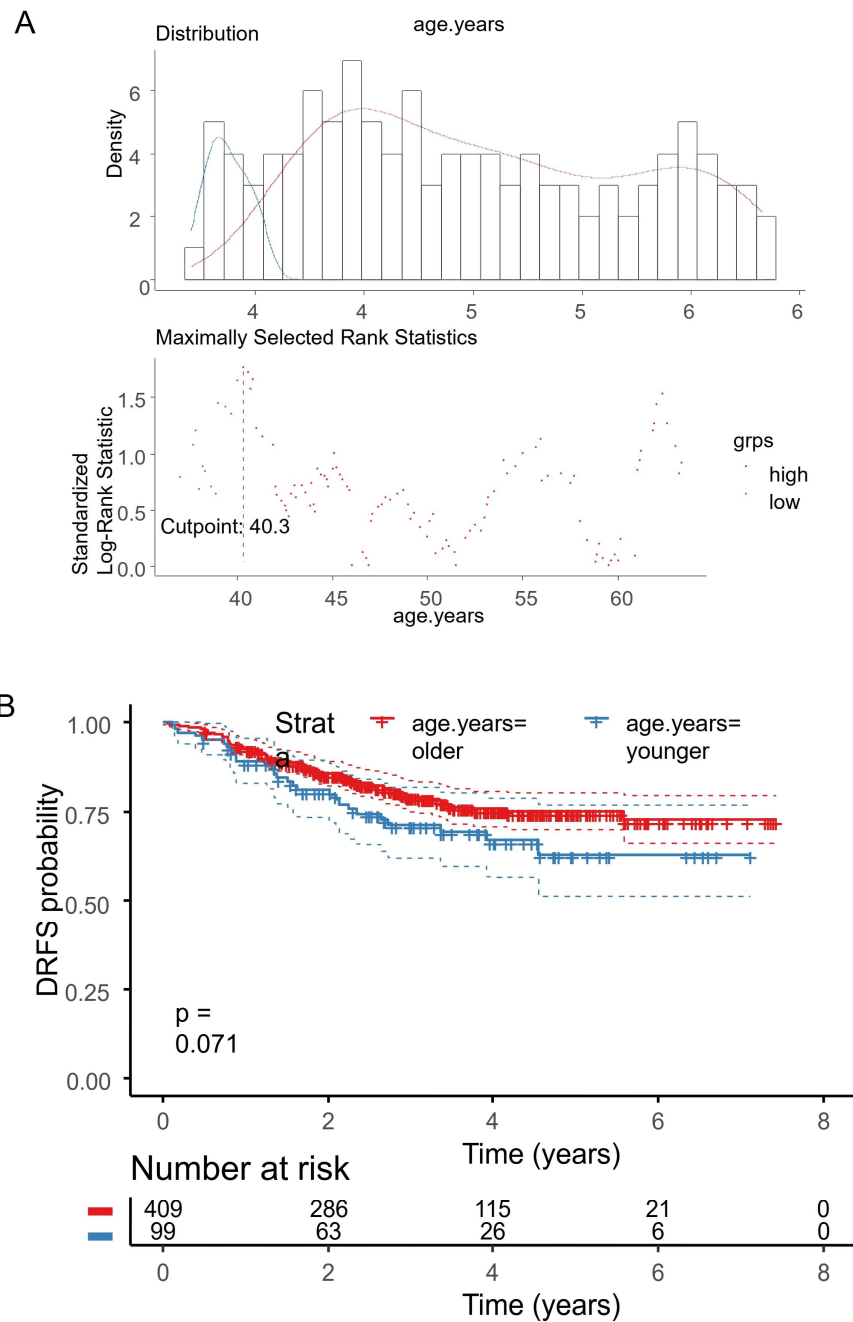

**Supplemental Figure 5:** Kaplan-Meier of the optimal age category stratification; A/optimal cutpoint threshold determination on age of the patients with distant relapse free survival (DRFS) as outcome; B/ Kaplan-Meier stratified on optimal threshold of age categories.

Global Schoenfeld Test p: 0.4278

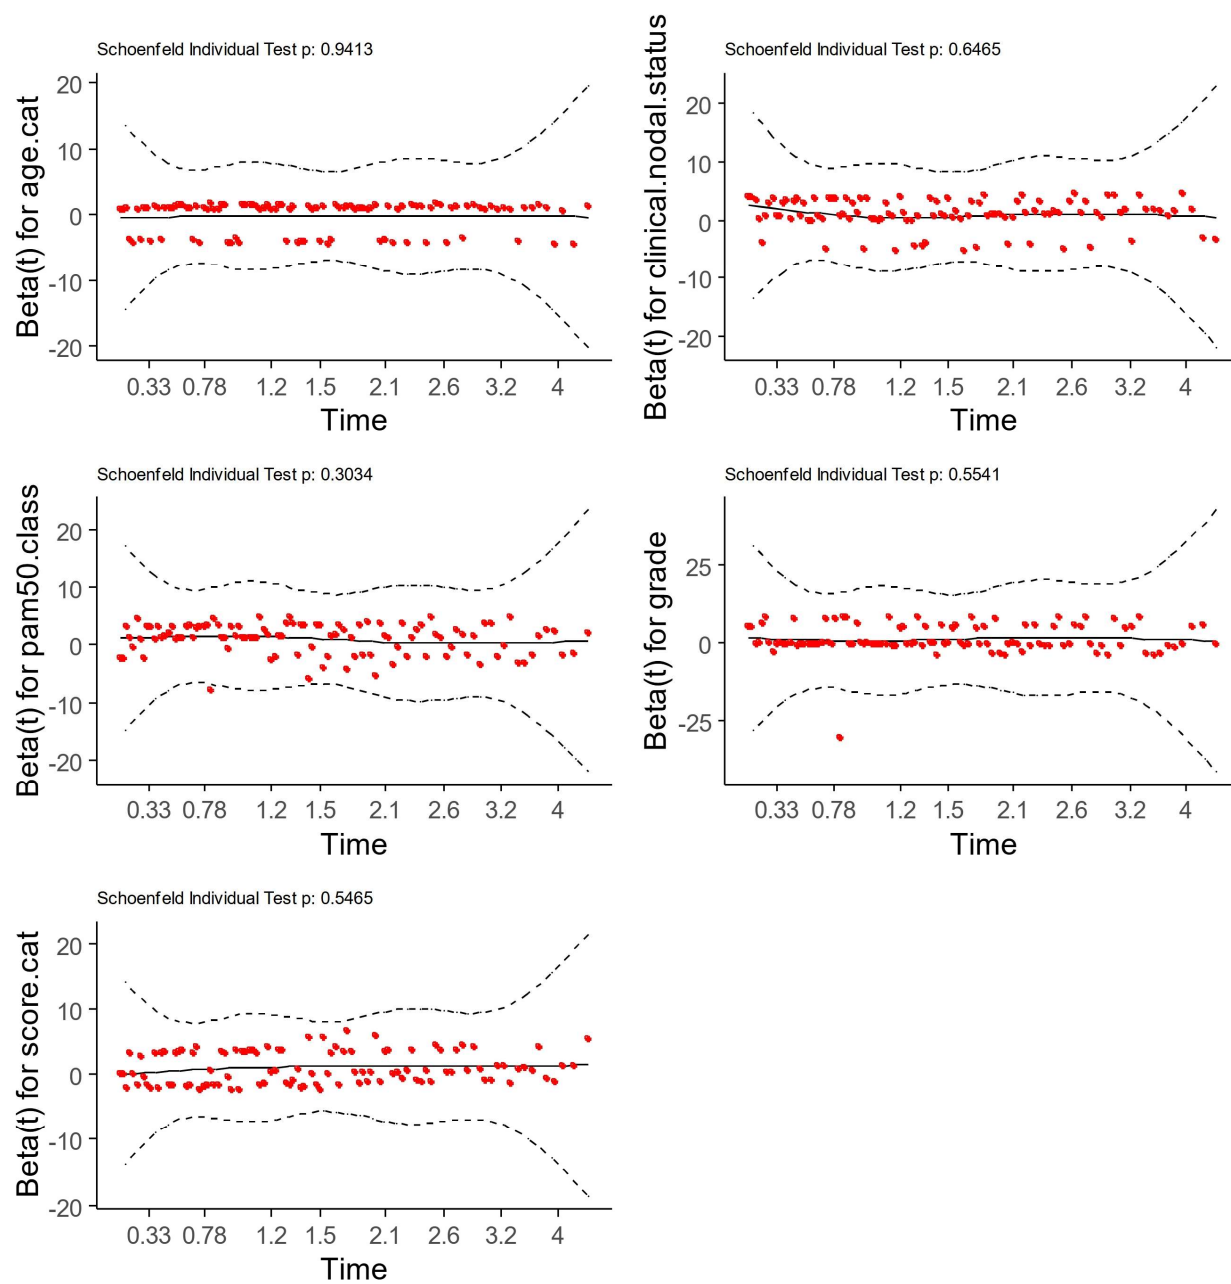

**Supplemental Figure S6:** Schoenfeld test of the multivariable model with DRFS as the outcome

**Table S1:** List of the univariate Cox analysis for the 252 ferroptosis related significant genes against Distant Relapse-Free Survival in the transcriptome cohort (GSE25066)

| identifiers | Coefficients |               |          |                |
|-------------|--------------|---------------|----------|----------------|
|             | beta         | Hazard Ratios | P-values | Adjusted p-val |
| AR          | -0,381       | 0,683         | 7,55E-12 | 6,52E-09       |
| PTTG1       | 0,792        | 2,207         | 1,45E-09 | 4,99E-07       |
| GATA3       | -0,284       | 0,753         | 1,73E-09 | 4,99E-07       |
| MYB         | -0,392       | 0,676         | 2,97E-09 | 6,41E-07       |
| XBP1        | -0,381       | 0,683         | 1,12E-08 | 1,93E-06       |
| ENO1        | 0,802        | 2,230         | 2,06E-08 | 2,63E-06       |
| SLC7A5      | 0,411        | 1,508         | 2,13E-08 | 2,63E-06       |
| AGR2        | -0,135       | 0,874         | 2,66E-08 | 2,88E-06       |
| LRIG1       | -0,414       | 0,661         | 3,39E-08 | 3,25E-06       |
| IRS1        | -0,329       | 0,719         | 4,69E-08 | 4,05E-06       |
| ITCH        | 1,348        | 3,849         | 5,50E-08 | 4,32E-06       |
| ESR1        | -0,236       | 0,790         | 8,54E-08 | 5,71E-06       |
| SLC9A3R1    | -0,519       | 0,595         | 8,59E-08 | 5,71E-06       |
| EGLN1       | 0,813        | 2,255         | 1,18E-07 | 7,30E-06       |
| RHOB        | -0,456       | 0,634         | 2,00E-07 | 1,15E-05       |
| BTG2        | -0,635       | 0,530         | 2,63E-07 | 1,42E-05       |
| SIAH2       | -0,281       | 0,755         | 3,93E-07 | 1,94E-05       |
| EGFR        | 0,363        | 1,438         | 4,04E-07 | 1,94E-05       |
| INPP4B      | -0,299       | 0,741         | 6,08E-07 | 2,77E-05       |
| MST1        | -0,442       | 0,643         | 8,12E-07 | 3,51E-05       |
| FOXA1       | -0,234       | 0,791         | 9,21E-07 | 3,79E-05       |
| MYD88       | 0,810        | 2,247         | 1,17E-06 | 4,57E-05       |
| FGFR3       | -0,228       | 0,796         | 1,22E-06 | 4,57E-05       |
| ERBB3       | -0,494       | 0,610         | 1,64E-06 | 5,89E-05       |
| TGFA        | 0,547        | 1,727         | 1,70E-06 | 5,89E-05       |
| CEBPB       | 0,528        | 1,696         | 1,95E-06 | 6,48E-05       |
| YBX1        | 0,533        | 1,704         | 2,81E-06 | 9,00E-05       |
| ODC1        | 0,450        | 1,568         | 3,46E-06 | 1,05E-04       |
| DDIT3       | 0,926        | 2,524         | 3,53E-06 | 1,05E-04       |
| CCNG2       | -0,510       | 0,601         | 3,90E-06 | 1,12E-04       |
| NDRG1       | 0,315        | 1,371         | 4,48E-06 | 1,25E-04       |
| DUSP4       | -0,185       | 0,831         | 4,81E-06 | 1,25E-04       |
| SDCBP       | 0,511        | 1,667         | 4,82E-06 | 1,25E-04       |
| LCN2        | 0,243        | 1,275         | 4,92E-06 | 1,25E-04       |
| TTK         | 0,357        | 1,429         | 5,32E-06 | 1,26E-04       |
| CYCS        | 0,731        | 2,078         | 5,44E-06 | 1,26E-04       |
| MCAM        | 0,519        | 1,681         | 5,52E-06 | 1,26E-04       |
| BCL2        | -0,381       | 0,683         | 5,53E-06 | 1,26E-04       |
| PLAUR       | 0,461        | 1,585         | 5,87E-06 | 1,28E-04       |
| CXCL8       | 0,194        | 1,215         | 5,91E-06 | 1,28E-04       |
| LYN         | 0,376        | 1,456         | 6,07E-06 | 1,28E-04       |
| IGF1R       | -0,338       | 0,713         | 6,70E-06 | 1,38E-04       |
| ERBB4       | -0,361       | 0,697         | 6,87E-06 | 1,38E-04       |
| MELK        | 0,360        | 1,433         | 9,74E-06 | 1,91E-04       |
| SPDEF       | -0,262       | 0,769         | 1,08E-05 | 2,07E-04       |
| ADM         | 0,359        | 1,432         | 1,12E-05 | 2,10E-04       |
| RARA        | -0,303       | 0,739         | 1,15E-05 | 2,11E-04       |
| CDC20       | 0,329        | 1,390         | 1,38E-05 | 2,49E-04       |



|         |        |       |          |          |
|---------|--------|-------|----------|----------|
| VEGFA   | 0,319  | 1,375 | 1,68E-05 | 2,96E-04 |
| AREG    | -0,201 | 0,818 | 1,73E-05 | 2,98E-04 |
| ANO1    | -0,222 | 0,801 | 1,82E-05 | 3,09E-04 |
| HMGA1   | 0,378  | 1,459 | 2,00E-05 | 3,32E-04 |
| KIF14   | 0,475  | 1,608 | 2,07E-05 | 3,38E-04 |
| PROM1   | 0,196  | 1,216 | 2,64E-05 | 4,17E-04 |
| AURKA   | 0,466  | 1,593 | 2,65E-05 | 4,17E-04 |
| CDK1    | 0,443  | 1,557 | 2,89E-05 | 4,46E-04 |
| CALR    | 0,712  | 2,039 | 3,92E-05 | 5,94E-04 |
| PRLR    | -0,389 | 0,678 | 4,18E-05 | 6,23E-04 |
| CCNE1   | 0,326  | 1,385 | 4,61E-05 | 6,75E-04 |
| RRM2    | 0,416  | 1,515 | 4,80E-05 | 6,90E-04 |
| MET     | 0,685  | 1,983 | 4,91E-05 | 6,90E-04 |
| DAPK1   | 0,492  | 1,636 | 4,95E-05 | 6,90E-04 |
| CXCL1   | 0,291  | 1,338 | 5,18E-05 | 7,10E-04 |
| VAV3    | -0,310 | 0,734 | 5,26E-05 | 7,10E-04 |
| ATF4    | 0,843  | 2,323 | 5,62E-05 | 7,47E-04 |
| MAPK3   | -0,287 | 0,751 | 7,38E-05 | 9,58E-04 |
| ADAM17  | 0,658  | 1,931 | 7,52E-05 | 9,58E-04 |
| PIM1    | 0,409  | 1,505 | 7,54E-05 | 9,58E-04 |
| SLC9A1  | -0,262 | 0,770 | 7,73E-05 | 9,68E-04 |
| TFRC    | 0,379  | 1,462 | 8,11E-05 | 9,90E-04 |
| IL1B    | 0,347  | 1,415 | 8,13E-05 | 9,90E-04 |
| LDHA    | 0,728  | 2,070 | 9,67E-05 | 1,16E-03 |
| PGR     | -0,183 | 0,833 | 9,93E-05 | 1,17E-03 |
| HMMR    | 0,665  | 1,944 | 9,99E-05 | 1,17E-03 |
| SMURF1  | 0,694  | 2,003 | 1,05E-04 | 1,21E-03 |
| PRMT5   | -0,265 | 0,767 | 1,08E-04 | 1,23E-03 |
| RUNX3   | 0,495  | 1,640 | 1,45E-04 | 1,62E-03 |
| MKI67   | 0,694  | 2,001 | 1,49E-04 | 1,64E-03 |
| GPNMB   | 0,278  | 1,321 | 1,52E-04 | 1,64E-03 |
| IGF2BP3 | 0,278  | 1,321 | 1,52E-04 | 1,64E-03 |
| LAPTM4B | 0,347  | 1,415 | 1,59E-04 | 1,70E-03 |
| NEDD4   | -0,391 | 0,676 | 1,71E-04 | 1,79E-03 |
| FOXC1   | 0,268  | 1,308 | 1,74E-04 | 1,79E-03 |
| CDH3    | 0,158  | 1,171 | 1,74E-04 | 1,79E-03 |
| DEK     | 0,371  | 1,449 | 1,94E-04 | 1,97E-03 |
| TPX2    | 0,395  | 1,484 | 1,99E-04 | 1,99E-03 |
| SPHK2   | -0,320 | 0,726 | 2,10E-04 | 2,08E-03 |
| LOXL2   | 0,291  | 1,337 | 2,12E-04 | 2,08E-03 |
| AKT3    | 0,395  | 1,485 | 2,16E-04 | 2,09E-03 |
| E2F3    | 0,555  | 1,743 | 2,25E-04 | 2,16E-03 |
| ANXA1   | 0,263  | 1,301 | 2,34E-04 | 2,22E-03 |
| FSCN1   | 0,252  | 1,287 | 2,38E-04 | 2,24E-03 |
| ITGB1   | 0,532  | 1,702 | 2,43E-04 | 2,26E-03 |
| PLAU    | 0,339  | 1,404 | 2,47E-04 | 2,27E-03 |
| PRDX3   | -0,524 | 0,592 | 2,60E-04 | 2,36E-03 |
| CD9     | -0,295 | 0,745 | 2,81E-04 | 2,53E-03 |
| HDGF    | 0,550  | 1,733 | 2,97E-04 | 2,63E-03 |
| UBE2C   | 0,382  | 1,465 | 2,98E-04 | 2,63E-03 |
| DDIT4   | 0,306  | 1,359 | 3,12E-04 | 2,69E-03 |
| SREBF1  | -0,341 | 0,711 | 3,12E-04 | 2,69E-03 |

|           |        |       |          |          |
|-----------|--------|-------|----------|----------|
| TXNRD1    | 0,493  | 1,637 | 3,17E-04 | 2,71E-03 |
| IKBKB     | -0,393 | 0,675 | 3,24E-04 | 2,75E-03 |
| GPX4      | -0,617 | 0,540 | 3,31E-04 | 2,78E-03 |
| HTATIP2   | 0,400  | 1,492 | 3,40E-04 | 2,82E-03 |
| STUB1     | -0,656 | 0,519 | 3,56E-04 | 2,93E-03 |
| KRT18     | -0,260 | 0,771 | 3,78E-04 | 3,08E-03 |
| UCHL1     | 0,221  | 1,248 | 3,86E-04 | 3,12E-03 |
| ALCAM     | -0,248 | 0,780 | 4,28E-04 | 3,42E-03 |
| RHOC      | -0,487 | 0,614 | 4,34E-04 | 3,44E-03 |
| CHEK1     | 0,443  | 1,557 | 4,88E-04 | 3,82E-03 |
| EIF4EBP1  | 0,279  | 1,321 | 4,98E-04 | 3,82E-03 |
| SLC2A1    | 0,453  | 1,574 | 5,01E-04 | 3,82E-03 |
| CCND1     | -0,195 | 0,823 | 5,02E-04 | 3,82E-03 |
| YWHAZ     | 0,551  | 1,735 | 5,04E-04 | 3,82E-03 |
| ITGA3     | -0,200 | 0,819 | 5,35E-04 | 4,02E-03 |
| NEDD8     | -0,574 | 0,563 | 5,63E-04 | 4,19E-03 |
| PRKDC     | 0,486  | 1,625 | 5,77E-04 | 4,26E-03 |
| WWP1      | -0,295 | 0,744 | 5,96E-04 | 4,36E-03 |
| FYN       | 0,341  | 1,406 | 6,02E-04 | 4,37E-03 |
| SEMA4D    | 0,348  | 1,416 | 6,16E-04 | 4,43E-03 |
| PLK1      | 0,367  | 1,444 | 6,22E-04 | 4,44E-03 |
| HDAC2     | 0,363  | 1,438 | 6,81E-04 | 4,76E-03 |
| BECN1     | -0,538 | 0,584 | 6,82E-04 | 4,76E-03 |
| MMP7      | 0,160  | 1,174 | 6,84E-04 | 4,76E-03 |
| GAPDH     | 0,636  | 1,888 | 6,88E-04 | 4,76E-03 |
| HIF1A     | 0,363  | 1,438 | 7,00E-04 | 4,80E-03 |
| PML       | 0,622  | 1,863 | 7,09E-04 | 4,82E-03 |
| CDKN2A    | 0,224  | 1,251 | 8,12E-04 | 5,48E-03 |
| FASN      | -0,271 | 0,763 | 8,25E-04 | 5,52E-03 |
| TSC2      | -0,236 | 0,789 | 8,49E-04 | 5,65E-03 |
| GDF15     | -0,174 | 0,840 | 8,75E-04 | 5,77E-03 |
| SET       | 0,695  | 2,003 | 8,93E-04 | 5,84E-03 |
| BTK       | 0,341  | 1,406 | 9,15E-04 | 5,94E-03 |
| ATG5      | 0,446  | 1,562 | 1,04E-03 | 6,65E-03 |
| SKP2      | 0,277  | 1,319 | 1,04E-03 | 6,65E-03 |
| MMP14     | 0,450  | 1,568 | 1,09E-03 | 6,94E-03 |
| CHI3L1    | 0,171  | 1,186 | 1,15E-03 | 7,21E-03 |
| XAF1      | 0,303  | 1,354 | 1,15E-03 | 7,21E-03 |
| TLR4      | 0,400  | 1,492 | 1,16E-03 | 7,21E-03 |
| TRAP1     | 0,621  | 1,861 | 1,19E-03 | 7,35E-03 |
| PYCARD    | -0,258 | 0,772 | 1,25E-03 | 7,64E-03 |
| AURKB     | 0,318  | 1,374 | 1,35E-03 | 8,23E-03 |
| ESRRA     | 0,630  | 1,878 | 1,42E-03 | 8,56E-03 |
| FOLR1     | 0,262  | 1,299 | 1,48E-03 | 8,89E-03 |
| IGFBP2    | -0,152 | 0,859 | 1,52E-03 | 9,04E-03 |
| KCNH2     | 0,364  | 1,439 | 1,56E-03 | 9,21E-03 |
| TFAP2A    | -0,321 | 0,725 | 1,59E-03 | 9,29E-03 |
| CXCR4     | 0,276  | 1,318 | 1,59E-03 | 9,29E-03 |
| TNFRSF12A | 0,409  | 1,505 | 1,61E-03 | 9,34E-03 |
| CDKN3     | 0,456  | 1,578 | 1,65E-03 | 9,51E-03 |
| ISG15     | 0,170  | 1,186 | 1,77E-03 | 1,01E-02 |
| GSTP1     | 0,250  | 1,284 | 1,80E-03 | 1,02E-02 |

|         |        |       |          |          |
|---------|--------|-------|----------|----------|
| TRPM2   | 0,425  | 1,530 | 1,82E-03 | 1,03E-02 |
| NEK2    | 0,251  | 1,285 | 2,08E-03 | 1,17E-02 |
| TNF     | 0,372  | 1,450 | 2,12E-03 | 1,18E-02 |
| CHEK2   | 0,448  | 1,565 | 2,15E-03 | 1,19E-02 |
| TOP2A   | 0,265  | 1,303 | 2,17E-03 | 1,19E-02 |
| TNFAIP3 | 0,320  | 1,377 | 2,22E-03 | 1,22E-02 |
| YWHAQ   | 0,501  | 1,650 | 2,41E-03 | 1,31E-02 |
| HES1    | -0,333 | 0,717 | 2,54E-03 | 1,37E-02 |
| SDC1    | 0,262  | 1,300 | 2,60E-03 | 1,39E-02 |
| BMI1    | -0,290 | 0,748 | 2,83E-03 | 1,51E-02 |
| MAD2L1  | 0,254  | 1,290 | 2,87E-03 | 1,52E-02 |
| IKBKG   | 0,527  | 1,695 | 2,90E-03 | 1,53E-02 |
| HSPD1   | 0,483  | 1,621 | 2,92E-03 | 1,53E-02 |
| XPO1    | 0,557  | 1,746 | 2,96E-03 | 1,54E-02 |
| SLC16A1 | 0,271  | 1,311 | 3,11E-03 | 1,61E-02 |
| YAP1    | 0,287  | 1,332 | 3,18E-03 | 1,63E-02 |
| MSLN    | 0,095  | 1,100 | 3,27E-03 | 1,67E-02 |
| ABCC4   | 0,222  | 1,249 | 3,32E-03 | 1,69E-02 |
| MCL1    | 0,419  | 1,521 | 3,34E-03 | 1,69E-02 |
| RPS6KB1 | -0,295 | 0,744 | 3,37E-03 | 1,69E-02 |
| ICAM1   | 0,362  | 1,436 | 3,48E-03 | 1,73E-02 |
| CCNA2   | 0,331  | 1,392 | 3,49E-03 | 1,73E-02 |
| TRIM28  | -0,433 | 0,648 | 3,53E-03 | 1,74E-02 |
| BIRC5   | 0,364  | 1,439 | 3,66E-03 | 1,80E-02 |
| SPP1    | 0,179  | 1,196 | 3,73E-03 | 1,82E-02 |
| NAMPT   | 0,223  | 1,250 | 3,75E-03 | 1,82E-02 |
| SMYD3   | -0,288 | 0,749 | 3,78E-03 | 1,82E-02 |
| CFLAR   | 0,474  | 1,607 | 3,90E-03 | 1,87E-02 |
| S100A7  | 0,075  | 1,078 | 3,98E-03 | 1,90E-02 |
| MAP2K1  | 0,536  | 1,708 | 4,03E-03 | 1,91E-02 |
| MAP3K14 | 0,370  | 1,448 | 4,05E-03 | 1,91E-02 |
| TXN2    | -0,578 | 0,561 | 4,18E-03 | 1,96E-02 |
| PRKCA   | 0,301  | 1,351 | 4,20E-03 | 1,96E-02 |
| PPP2CA  | -0,478 | 0,620 | 4,32E-03 | 2,01E-02 |
| DKK1    | 0,209  | 1,232 | 4,41E-03 | 2,03E-02 |
| EPOR    | 0,349  | 1,417 | 4,42E-03 | 2,03E-02 |
| HPSE    | 0,198  | 1,219 | 4,94E-03 | 2,26E-02 |
| KRAS    | 0,546  | 1,726 | 5,01E-03 | 2,28E-02 |
| MAP2K7  | 0,463  | 1,588 | 5,25E-03 | 2,36E-02 |
| IL6     | 0,331  | 1,392 | 5,26E-03 | 2,36E-02 |
| S100A9  | 0,126  | 1,135 | 5,26E-03 | 2,36E-02 |
| TYMS    | 0,231  | 1,259 | 5,39E-03 | 2,40E-02 |
| ETS2    | 0,334  | 1,396 | 5,52E-03 | 2,44E-02 |
| PIK3R1  | -0,276 | 0,759 | 5,67E-03 | 2,50E-02 |
| ULK1    | -0,221 | 0,802 | 5,74E-03 | 2,52E-02 |
| MTA1    | -0,458 | 0,633 | 5,83E-03 | 2,54E-02 |
| E2F1    | 0,501  | 1,650 | 5,93E-03 | 2,57E-02 |
| STAT6   | -0,445 | 0,641 | 6,00E-03 | 2,59E-02 |
| EZH2    | 0,214  | 1,239 | 6,30E-03 | 2,71E-02 |
| IRF1    | 0,390  | 1,477 | 6,54E-03 | 2,80E-02 |
| GJA1    | -0,112 | 0,894 | 6,62E-03 | 2,80E-02 |
| HBEGF   | 0,315  | 1,371 | 6,64E-03 | 2,80E-02 |

|         |        |       |          |          |
|---------|--------|-------|----------|----------|
| ADAM12  | 0,313  | 1,367 | 6,65E-03 | 2,80E-02 |
| PEBP1   | -0,420 | 0,657 | 6,81E-03 | 2,84E-02 |
| LIMK1   | -0,214 | 0,807 | 6,82E-03 | 2,84E-02 |
| CCL5    | 0,201  | 1,223 | 6,83E-03 | 2,84E-02 |
| PIK3CB  | 0,465  | 1,592 | 6,91E-03 | 2,85E-02 |
| MAP3K5  | 0,366  | 1,442 | 7,01E-03 | 2,88E-02 |
| NOTCH1  | 0,298  | 1,347 | 7,05E-03 | 2,89E-02 |
| BAD     | -0,204 | 0,816 | 7,10E-03 | 2,90E-02 |
| CLU     | -0,124 | 0,883 | 7,16E-03 | 2,91E-02 |
| VIM     | 0,218  | 1,243 | 7,39E-03 | 2,98E-02 |
| HMOX1   | 0,202  | 1,224 | 7,58E-03 | 3,05E-02 |
| MARCKS  | 0,268  | 1,307 | 7,72E-03 | 3,09E-02 |
| BIRC3   | 0,207  | 1,230 | 7,89E-03 | 3,14E-02 |
| NLK     | -0,370 | 0,691 | 7,92E-03 | 3,14E-02 |
| CCNB1   | 0,314  | 1,369 | 8,06E-03 | 3,18E-02 |
| KPNA2   | 0,292  | 1,340 | 8,09E-03 | 3,18E-02 |
| MGMT    | -0,335 | 0,715 | 8,25E-03 | 3,23E-02 |
| CDC37   | -0,188 | 0,829 | 8,33E-03 | 3,24E-02 |
| MAPK9   | -0,189 | 0,828 | 8,42E-03 | 3,26E-02 |
| EDN1    | 0,161  | 1,175 | 8,60E-03 | 3,30E-02 |
| ERCC1   | -0,611 | 0,543 | 8,60E-03 | 3,30E-02 |
| TKTL1   | 0,219  | 1,244 | 8,95E-03 | 3,41E-02 |
| RAD51   | 0,291  | 1,337 | 8,99E-03 | 3,41E-02 |
| NDUFA13 | -0,377 | 0,686 | 9,00E-03 | 3,41E-02 |
| FOXM1   | 0,171  | 1,186 | 9,08E-03 | 3,43E-02 |
| BID     | 0,342  | 1,408 | 9,67E-03 | 3,62E-02 |
| CD40    | 0,369  | 1,446 | 9,69E-03 | 3,62E-02 |
| PRDX2   | -0,352 | 0,703 | 9,79E-03 | 3,65E-02 |
| HMGA2   | 0,322  | 1,379 | 1,00E-02 | 3,71E-02 |
| PAWR    | -0,328 | 0,720 | 1,00E-02 | 3,71E-02 |
| VCAM1   | 0,198  | 1,219 | 1,01E-02 | 3,73E-02 |
| RARB    | 0,352  | 1,421 | 1,07E-02 | 3,93E-02 |
| S100A8  | 0,106  | 1,111 | 1,09E-02 | 3,99E-02 |
| BIRC2   | 0,386  | 1,471 | 1,10E-02 | 4,00E-02 |
| PRKCB   | 0,235  | 1,265 | 1,11E-02 | 4,00E-02 |
| CCNA1   | 0,245  | 1,278 | 1,11E-02 | 4,00E-02 |
| IGFBP3  | 0,152  | 1,164 | 1,14E-02 | 4,06E-02 |
| PRKCD   | -0,195 | 0,823 | 1,14E-02 | 4,06E-02 |
| UBE2D1  | 0,297  | 1,346 | 1,15E-02 | 4,07E-02 |
| COPS5   | 0,361  | 1,435 | 1,18E-02 | 4,19E-02 |
| FOXO4   | -0,182 | 0,834 | 1,20E-02 | 4,23E-02 |
| THBS1   | -0,197 | 0,821 | 1,25E-02 | 4,37E-02 |
| CD82    | 0,276  | 1,318 | 1,25E-02 | 4,38E-02 |
| VCAN    | 0,150  | 1,162 | 1,27E-02 | 4,41E-02 |
| HMGB1   | 0,382  | 1,465 | 1,29E-02 | 4,49E-02 |
| CDK8    | 0,334  | 1,396 | 1,32E-02 | 4,56E-02 |
| SP1     | -0,164 | 0,848 | 1,33E-02 | 4,58E-02 |
| IDO1    | 0,176  | 1,192 | 1,42E-02 | 4,87E-02 |
